# Supplementary material
Source: HighWire-hosted journal article supplement (http://heartasia.bmj.com/highwire/filestream/136936/field_highwire_adjunct_files/0/heartasia-2014-010557supp_appendix.pdf)
Supplement: heartasia-2014-010557supp_appendix.pdf [file heartasia-2014-010557supp_appendix.pdf]

**Appendix 1:** Smoking status among government employees by sex and city (N=6,176); ages 18-61

|           |                 | Males |       | Females |       |
|-----------|-----------------|-------|-------|---------|-------|
|           |                 | N     | %     | N       | %     |
| Overall   | Current smokers | 1352  | 40.7% | 43      | 1.5%  |
|           | Former smoker   | 188   | 5.7%  | 10      | 0.4%  |
|           | Never smokers   | 1781  | 53.6% | 2802    | 98.1% |
| Changchun | Current smokers | 282   | 36.4% | 12      | 1.6%  |
|           | Former smoker   | 46    | 1.4%  | 5       | 0.2%  |
|           | Never smokers   | 446   | 13.4% | 714     | 25.0% |
| Kelamayi  | Current smokers | 105   | 46.7% | 8       | 1.5%  |
|           | Former smoker   | 20    | 16.7% | 3       | 0.6%  |
|           | Never smokers   | 100   | 56.2% | 514     | 99.6% |
| Nanning   | Current smokers | 78    | 36.8% | 2       | 1.3%  |
|           | Former smoker   | 13    | 6.1%  | 0       | 0.0%  |
|           | Never smokers   | 121   | 57.1% | 157     | 98.7% |
| Suzhou    | Current smokers | 319   | 38.7% | 4       | 0.9%  |
|           | Former smoker   | 55    | 6.7%  | 0       | 0.0%  |
|           | Never smokers   | 450   | 54.6% | 455     | 99.1% |
| Tangshan  | Current smokers | 237   | 41.5% | 6       | 1.8%  |
|           | Former smoker   | 21    | 3.7%  | 0       | 0.0%  |
|           | Never smokers   | 313   | 54.8% | 333     | 98.2% |

|          |                 |     |       |     |       |
|----------|-----------------|-----|-------|-----|-------|
| Yinchuan | Current smokers | 331 | 46.3% | 11  | 1.7%  |
|          | Former smoker   | 33  | 4.6%  | 2   | 0.3%  |
|          | Never smokers   | 351 | 49.1% | 629 | 98.0% |

**Appendix 2.** Smoking status among male government employees by city, education, and occupational status (N=3,321); ages 18-61

| City      |                        |                             | Current   | Former  | Never     | p-value |
|-----------|------------------------|-----------------------------|-----------|---------|-----------|---------|
| Changchun | Educational attainment | Secondary school or less    | 13 (29.9) | 1 (2.2) | 31 (68.9) | 0.004   |
|           |                        | High school graduate        | 26(27.1)  | 1 (1.0) | 69(71.9)  |         |
|           |                        | College graduate            | 236(19.9) | 46(3.9) | 905(76.2) |         |
|           |                        | Post graduate               | 19(10.7)  | 3(1.7)  | 155(87.6) |         |
|           | Occupation             | Workers                     | 198(17.9) | 39(3.5) | 868(78.6) | 0.115   |
|           |                        | Mid-level manager           | 77(24.7)  | 9(2.9)  | 226(72.4) |         |
|           |                        | Senior Executive or leaders | 19(21.6)  | 3(3.4)  | 66(75.0)  |         |
| Kelamayi  | Educational attainment | Secondary school or less    | 7(26.9)   | 2 (7.7) | 17 (65.4) | 0.308   |
|           |                        | High school graduate        | 22(15.1)  | 3 (2.1) | 121(82.9) |         |
|           |                        | College graduate            | 83(14.7)  | 17(3.0) | 466(82.3) |         |
|           |                        | Post graduate               | 1 (8.3)   | 1 (8.3) | 10 (83.3) |         |
|           | Occupation             | Workers                     | 92(13.7)  | 22(3.3) | 557(83.0) | 0.023   |
|           |                        | Mid-level manager           | 17(24.6)  | 1(1.5)  | 51(73.9)  |         |
|           |                        | Senior Executive or leaders | 4 (40.0)  | 0       | 6 (60.0)  |         |
| Nanning   | Educational attainment | Secondary school or less    | 6(31.6)   | 0       | 13(68.4)  | 0.000   |
|           |                        | High school graduate        | 10(62.5)  | 0       | 6(37.5)   |         |
|           |                        | College graduate            | 56(21.6)  | 8(3.1)  | 195(75.3) |         |
|           |                        | Post graduate               | 8(10.4)   | 5(10.6) | 34(72.3)  |         |
|           | Occupation             | Workers                     | 58(22.0)  | 6(2.3)  | 200(75.8) | 0.250   |
|           |                        | Mid-level manager           | 22(21.2)  | 7(6.7)  | 75(72.1)  |         |
|           |                        | Senior Executive or leaders | 0         | 0       | 3(100.0)  |         |
| Suzhou    | Educational attainment | Secondary school or less    | 14 (53.9) | 1(3.9)  | 11(42.3)  | 0.000   |
|           |                        | High school graduate        | 44(48.4)  | 1 (1.1) | 46 (50.6) |         |

|                 |                               |                             |           |         |            |       |
|-----------------|-------------------------------|-----------------------------|-----------|---------|------------|-------|
| <b>Tangshan</b> | <i>Occupation</i>             | College graduate            | 220(22.6) | 44(4.5) | 708(72.8)  | 0.000 |
|                 |                               | Post graduate               | 45(23.2)  | 9 (4.6) | 140(72.2)  |       |
|                 |                               | Workers                     | 220(23.6) | 26(2.8) | 688(73.7)  |       |
|                 |                               | Mid-level manager           | 90(30.5)  | 24(8.1) | 181(61.4)  |       |
|                 | <i>Educational attainment</i> | Senior Executive or leaders | 13(24.1)  | 5(9.3)  | 36(66.7)   | 0.275 |
|                 |                               | Secondary school or less    | 171(27.8) | 18(2.9) | 427(69.3)  |       |
|                 |                               | High school graduate        | 22(27.2)  | 1(1.2)  | 58(71.6)   |       |
|                 |                               | College graduate            | 50(23.5)  | 2(1.0)  | 161(75.6)  |       |
|                 | <i>Occupation</i>             | Post graduate               | 0         | 0       | 0          | 0.371 |
|                 |                               | Workers                     | 173(25.4) | 15(2.2) | 492(72.4)  |       |
|                 |                               | Mid-level manager           | 59(30.3)  | 4(2.1)  | 132(67.7)  |       |
|                 |                               | Senior Executive or leaders | 11(31.4)  | 2(5.7)  | 22(62.9)   |       |
|                 | <i>Educational attainment</i> | Secondary school or less    | 11 (45.8) | 1 (4.2) | 12(50.0)   | 0.000 |
|                 |                               | High school graduate        | 44 (40.4) | 0       | 65 (59.6)  |       |
|                 |                               | College graduate            | 272(24.5) | 28(2.5) | 810 (73.0) |       |
|                 |                               | Post graduate               | 15(13.2)  | 6 (5.3) | 93 (81.6)  |       |
| <b>Yinchuan</b> | <i>Occupation</i>             | Workers                     | 202(21.3) | 16(1.7) | 730(77.0)  | 0.000 |
|                 |                               | Mid-level manager           | 113(31.2) | 18(5.0) | 231(63.8)  |       |
|                 |                               | Senior Executive or leaders | 27 (57.5) | 1 (2.1) | 19 (40.4)  |       |
|                 |                               |                             |           |         |            |       |

Notes: Sample size (N) with row percentages shown in parentheses. Row percentages sum to 100%. P-values are from chi-square tests of the association between the SEP indicator (educational attainment or occupation) and smoking status (current, former, never).
